# Supplementary material for: Benzene ring crosslinking of a sulfonated polystyrene-grafted SEBS (S-SEBS-g-PSt) membrane by the Friedel–Crafts reaction for superior desalination performance by pervaporation
Source: Royal Society of Chemistry journal article supplement (doi:10.1039/d1ta09700h), 2021-12-15
Supplement: d1ta09700h1.pdf [file d1ta09700h1.pdf]

---

## **Electronic supplementary information**

### **Benzene ring crosslinking of sulfonated polystyrene-grafted SEBS (S-SEBS-g-PSt) membrane by Friedel-Crafts reaction for superior desalination performance by pervaporation**

Mengyu Yan,<sup>a</sup> Feixiang Zeng,<sup>b</sup> Na Li,<sup>\*a</sup> Wenhai Bian,<sup>a</sup> Weiyu Shen<sup>a</sup> and Zongli Xie<sup>\*c</sup>

<sup>a</sup> School of Chemical Engineering and Technology, Xi'an Jiaotong University, Xi'an, 710049, China

<sup>b</sup> Science and Technology on Reactor Fuel and Materials Laboratory, Nuclear Power Institute of China, Chengdu, 610213, China

<sup>c</sup> CSIRO Manufacturing, Private bag 10, Clayton South, VIC 3169, Australia

Corresponding author emails: [lina@mail.xjtu.edu.cn](mailto:lina@mail.xjtu.edu.cn); [zongli.xie@csiro.au](mailto:zongli.xie@csiro.au)

#### **Experimental Section**

##### **S-SEBS-g-PSt synthesis and membrane preparation**

For membrane fabrication, the as-prepared SEBS-g-PSt (S-SEBS-g-PSt) powder was dissolved in chloroform under stirring to obtain 8 wt% homogeneous dope solution. The controlled amount of dope solution was cast onto a Teflon dish and the solvent was then evaporated. The obtained membrane was sulfonated by immersing into the mixture of DCE and sulfonating reagent (acetyl sulfate) at 45 °C for 4 h, 10 h and 14 h. After being washed with deionized water till neutral pH, the S-SEBS-g-PSt membranes with SD=30%, 50% and 60% were obtained, respectively.

##### **Membrane characterization**

Table S1. Elemental analysis results of SEBS@CH<sub>2</sub>Cl and SEBS-g-PSt

| Material                | C/H           | Chloromethylation ratio, (%) | Grafting degree (%) |
|-------------------------|---------------|------------------------------|---------------------|
| SEBS                    | 7.1267±0.0013 | —                            | —                   |
| SEBS@CH <sub>2</sub> Cl | 7.1739±0.0006 | 43.4                         | —                   |
| SEBS-g-PSt              | 8.0074±0.0011 | 43.4                         | 272.2               |

---

## Results and discussion section

### Physicochemical characteristics of membrane

**Mechanical and thermal stability.** As shown in Table S2, in comparison with other polymeric membranes in the literature, the tensile strength and Young's modulus of the highly crosslinked membranes rank high.

Table S2. Comparison of mechanical strength of polymer-based membranes.

| Membrane                                                                       | Tensile strength,<br>MPa,   | Young's modulus,<br>Mpa, | Reference |
|--------------------------------------------------------------------------------|-----------------------------|--------------------------|-----------|
| PVB/PVDF blended membrane                                                      | <10                         | —                        | [1]       |
| SPSf/Tröger's base blend<br>membrane                                           | 0.34±0.06                   | 4.89±0.57                | [2]       |
| PANI/PVA membrane                                                              | 33.7                        | —                        | [3]       |
| PVB based polymer membrane                                                     | 16.33                       | —                        | [4]       |
| Phosphoric acid doped PBIANI<br>membrane                                       | 26±3                        | —                        | [5]       |
| PVFM/PEO blended membrane                                                      | 12.81                       | —                        | [6]       |
| PVA/PAA membrane                                                               | 1.39-3.47                   | —                        | [7]       |
| PEO membrane                                                                   | 37.78                       | 310                      | [8]       |
| P(AA-AMPS <sub>2</sub> -crosslinked<br>PVA/PAN nanofiber composite<br>membrane | 31.25±4.97                  | —                        | [9]       |
| PVB-EVOH blend membrane                                                        | 4-6.5                       | 20-120                   | [10]      |
| PVDF membrane                                                                  | 2-14                        | —                        | [11]      |
| pDA/TpPa(W/E)-COF<br>membrane                                                  | 13.1 ± 0.2 to<br>17.5 ± 0.5 | —                        | [12]      |
| FDA crosslinked S-SEBS-g-PSt                                                   | 21-32.5                     | 194-395                  | This work |

---

## Pervaporation performance

**Effect of operating conditions.** The linear relationship between the logarithmic water permeance and the reciprocal temperature was shown in Fig.S1, by which  $E_p$  was calculated as  $-34.92$  kJ/mol from the slope of the Arrhenius plot.

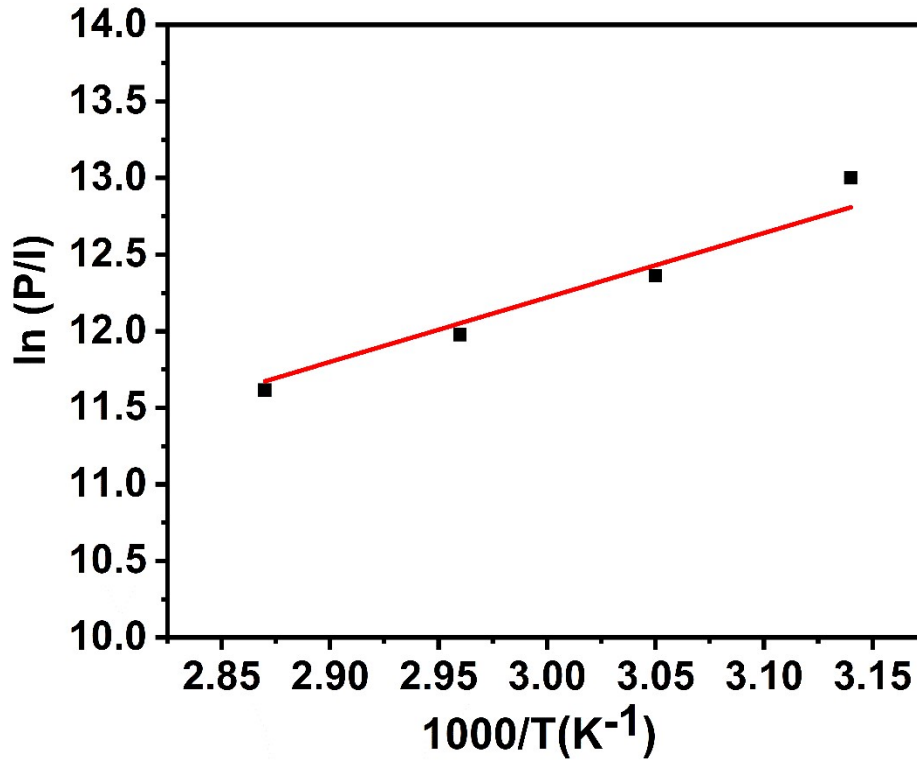

Fig.S1. The Arrhenius plot of water permeance with feed temperature in desalinating 5 wt% NaCl aqueous solution.

**Comparison of membrane performance with literatures.** Water permeability of the optimized membrane S1-60-2.88-80 (SD=60%) was calculated and compared to the state-of-art membranes deployed for PV desalination in the literature (as listed in Table S3). The results indicate that over a wide salt concentration range of 3.5-20 wt%, the FDA-crosslinked S-SEBS-g-PSt membrane exhibited the highest water permeability of 1,500,000–3,500,000 barrer and outperformed the other reported membranes by 1–2 orders. Our previous reported S-SEBS membrane also showed notably high water permeability (1,350,000–2,160,000 barrer). This is attributed to the advantageous features of the SAP membranes with strong hydrophilic sulfonic acid groups and inherent continuous ionic nano-channels to facilitate water diffusion. The higher water permeability of S-SEBS-g-PSt membrane than S-SEBS membrane proves the significance of polystyrene-grafting modification and FDA crosslinking.

Table S3. Comparison of pervaporative desalination performance of membranes.

| Membrane                                           | NaCl, wt% | Operating conditions | $p_r$ (kPa) | Flux, Kg/(m <sup>2</sup> ·h) | Water permeability, 10 <sup>4</sup> Barrer, | Salt rejection, % | Reference |
|----------------------------------------------------|-----------|----------------------|-------------|------------------------------|---------------------------------------------|-------------------|-----------|
| ZSM-5                                              | 0.3       | 75 °C, vacuum        | 38.53       | 11.5                         | 4.540                                       | 99                | [13]      |
| Silicalite-1                                       | 0.3~15    | 75 °C, vacuum        | 36.58~38.53 | 3~11.3                       | 2.26~8.1                                    | 97~99             | [13]      |
| FAU zeolite membrane                               | 3.5       | 50~90 °C, 10KPa      | 12.22~69.32 | 0.96~5.64                    | 1~4.58                                      | 99.8              | [14]      |
| pure silica membrane                               | 0.3       | 22 °C, vacuum        | 2.34        | 9.5                          | 9.356                                       | 99.6              | [15]      |
| CTAB-silica membrane                               | 4         | 25 °C, 0.6KPa        | 3.13        | 2.6                          | 0.995                                       | 99.9              | [16]      |
| Ethenylene-bridged organosilica membranes          | 0.2~3.5   | 25 °C, vacuum        | 3.13~3.17   | 3.8~4.8                      | 0.55~0.69                                   | 99.5              | [17]      |
| Inorganic membranes                                |           |                      |             |                              |                                             |                   |           |
| Cobalt oxide silica(CoOxSi,                        | 1         | 75 °C, vacuum        | 38.45       | 1.8                          | 0.060                                       | 99                | [18]      |
| ZIF-7                                              | 3.5       | 50 °C, vacuum        | 12.22       | 9.2                          | 69.400                                      | 99.5              | [19]      |
| ZIF-8                                              | 3.5       | 50 °C, vacuum        | 12.22       | 8.1                          | 61.102                                      | 99.8              | [19]      |
| Hydroxyl sodalite                                  | 3.5       | 30 °C, 0.3KPa        | 4.2         | 0.12                         | 0.142                                       | 99.99             | [20]      |
| TiO <sub>2</sub> /α-Al <sub>2</sub> O <sub>3</sub> | 0.3~10    | 75 °C, <10KPa        | 37.29~38.53 | 4~10.5                       | 0.2~0.51                                    | 99                | [21]      |
| FAS grafted ceramic membrane                       | 3         | 40 °C, 0.4KPa        | 7.32        | 5                            | 76.596                                      | —                 | [22]      |
| maleic acid covalent-bridged MXene membrane        | 3.5       | 65 °C, 0.133KPa      | 24.75       | 79.3                         | 0.445                                       | 99                | [23]      |
| PDA-modified GO/α-Al <sub>2</sub> O <sub>3</sub>   | 3.5       | 90 °C, vacuum        | 69.32       | 48.4                         | 1.287                                       | 99.7              | [24]      |
| Organic membranes                                  |           |                      |             |                              |                                             |                   |           |
| Cellulose acetate                                  | 4~14      | 70 °C, vacuum        | 26.69~30.79 | 3.45~5.97                    | 13.7~20.6                                   | 99.7              | [25]      |
| Cellulose triacetate                               | 10        | 50 °C, vacuum        | 11.94       | 2.5                          | 9.650                                       | 99                | [26]      |
| polyster                                           | 3.5       | 20 °C, vacuum        | 2.31        | 0.0071                       | 10.625                                      | 99.84             | [27]      |
| polyether ester                                    | 3.2~5.2   | 22~28.7 °C, vacuum   | 2.3~4.2     | 0.13~0.16                    | 28.1~41.6                                   | —                 | [28]      |
| Poly vinyl alcohol                                 | 3         | 70 °C, vacuum        | 30.89       | 7.4                          | 0.110                                       | 99.9              | [29]      |
|                                                    | 1         | 65 °C, 6KPa          | 24.95       | 22.87                        | 216.937                                     |                   | [30]      |
| S-SEBS                                             | 3         | 65 °C, 6KPa          | 24.79       | 20.41                        | 195.251                                     | 99.9              | [30]      |
|                                                    | 5         | 65 °C, 6KPa          | 24.63       | 14                           | 135.080                                     |                   | [30]      |
| PEBA                                               | 20        | 65 °C, 1.7KPa        | 23.24       | 0.5~1.7                      | 9.62~14.54                                  | 99.9              | [31]      |

|                                                         |     |                     |             |         |          |        |           |
|---------------------------------------------------------|-----|---------------------|-------------|---------|----------|--------|-----------|
|                                                         | 3.5 | 65 °C, 6KPa         | 24.75       | 69.52   | 341.783  | 99.98  | This work |
| FDA crosslinked                                         | 5   | 65 °C, 6KPa         | 24.63       | 64.31   | 318.205  | 99.98  | This work |
| S-SEBS-g-PSt                                            | 10  | 65 °C, 6KPa         | 24.2        | 50.6    | 256.284  | 99.991 | This work |
|                                                         | 20  | 65 °C, 6KPa         | 23.24       | 27.9    | 149.179  | 99.998 | This work |
| <hr/>                                                   |     |                     |             |         |          |        |           |
| poly(vinyl<br>alcohol,<br>/polyacrylonitrile            | 0.5 | 20 °C, 0.1KPa       | 2.34        | 9.04    | 11.533   | 99.5   | [32]      |
| S-PVA/PAN                                               | 3.5 | 70 °C, 0.1KPa       | 30.84       | 46.3    | 5.554    | 99.5   | [33]      |
|                                                         | 3.5 | 30 °C, 0.1KPa       | 4.2         | 14.11   | 12.690   | 99.7   | [33]      |
| poly(vinyl<br>alcohol,<br>/polysulfone<br>composite     | 3   | 50~70 °C,<br>vacuum | 12.24~30.89 | 4.6~7.4 | 1.1~8.14 | 99.9   | [29]      |
| PVA/silica                                              | 3   | 60 °C, vacuum       | 19.75       | 10.4    | 0.558    | 99.9   | [34]      |
| GO/PAN                                                  | 3.5 | 90 °C, 0.1KPa       | 69.32       | 65.1    | 0.433    | 99.8   | [35]      |
| PEI/GO LbL                                              | 20  | 65 °C, 1.7KPa       | 23.24       | 8.4     | 1.078    | 99.9   | [36]      |
| glutaraldehyde<br>crosslinked GO-                       | 5   | 65 °C, 6KPa         | 24.63       | 46      | 1.138    |        | [37]      |
|                                                         | 10  | 65 °C, 6KPa         | 24.2        | 42      | 1.064    | 99.99  | [37]      |
| PVA                                                     | 15  | 65 °C, 6KPa         | 23.74       | 34      | 0.883    |        | [37]      |
|                                                         | 20  | 65 °C, 6KPa         | 23.24       | 27.5    | 0.735    |        | [37]      |
| glutaraldehyde<br>crosslinked<br>composite<br>membranes | 3.5 | 70 °C, 0.1KPa       | 30.84       | 69.1    | 1.243    | 99.9   | [38]      |
| S-PVA/PSF<br>composite<br>membrane                      | 3.5 | 70 °C, 0.1KPa       | 30.74       | 60.79   | 10.242   | 99.8   | [39]      |
| GO/CS                                                   | 5   | 81 °C, 6KPa         | 46.61       | 30      | 40.858   | 99.9   | [40]      |
| PVA/PTFE                                                | 3.5 | 75 °C, 0.1KPa       | 38.14       | 152.3   | 18.453   | 99.9   | [41]      |
| PVA/PVDF                                                | 10  | 80 °C, 5KPa         | 45.8        | 10.3    | 2.327    | 99.999 | [42]      |
| Mxene/PAN                                               | 3.5 | 65 °C, 0.4KPa       | 24.75       | 85.4    | 0.970    | 99.5   | [43]      |
| Sulfosuccinic<br>acid crosslinked<br>PVA/PAN            | 3.5 | 70 °C, 0.1KPa       | 30.84       | 27.9    | 20.498   | 99.8   | [44]      |
| P(AA-AMPS,-<br>crosslinked                              | 1.5 | 75 °C, 0.1KPa       | 38.38       | 243     | 21.358   |        |           |
|                                                         | 3.5 | 75 °C, 0.1KPa       | 38.14       | 212     | 18.751   |        |           |
| PVA/PAN<br>nanofiber<br>composite<br>membrane           | 10  | 75 °C 0.1KPa        | 37.29       | 150     | 13.571   | 99.9   | [9]       |
|                                                         | 20  | 75 °C 0.1KPa        | 35.81       | 75      | 7.067    |        |           |

---

## References

- [1] L. Yan and J. Wang, *Desalination*, 2011, **281**, 455-461.
- [2] J. Yin, H. Tang, Z. Xu and N. Li, *J. Memb. Sci.*, 2021, **625**, 119138.
- [3] X. Chu, X. Zhao, Y. Zhou, Y. Wang, X. Han, Y. Zhou, J. Ma, Z. Wang, H. Huang, Z. Xu, C. Yan, H. Zhang, W. Yang and J. Chen, *Nano Energy*, 2020, **76**, 105179.
- [4] F. Lian, Y. Wen, Y. Ren and H. Guan, *J. Memb. Sci.*, 2014, **456**, 42-48.
- [5] S. Bhadra, N.H. Kim and J.H. Lee, *J. Memb. Sci.*, 2010, **349**, 304-311.
- [6] X. Pan, F. Lian, Y. He, Y. Peng, X. Sun, Y. Wen and H. Guan, *J. Appl. Polym. Sci.*, 2015, **132**, 41839.
- [7] G.M. Wu, S.J. Lin and C.C. Yang, *J. Memb. Sci.*, 2006, **275**, 127-133.
- [8] Y.C. Cao, C. Xu, X. Wu, X. Wang, L. Xing and K. Scott, *J. Power Sources*, 2011, **196**, 8377-8382.
- [9] Y.L. Xue, J. Huang, C.H. Lau, B. Cao and P. Li, *Nat. Commun.*, 2020, **11**, 1-9.
- [10] X. Fu, H. Matsuyama, M. Teramoto and H. Nagai, *Sep. Purif. Technol.*, 2006, **52**, 363-371.
- [11] Y. Lin, Y. Tang, H. Ma, J. Yang, Y. Tian, W. Ma and X. Wang, *J. Appl. Polym. Sci.*, 2009, **114**, 1523-1528.
- [12] Y. Zhang, J. Guo, G. Han, Y. Bai, Q. Ge, J. Ma, C. H. Lau and L. Shao, *Sci. Adv.*, 2021, **7**, 1-10.
- [13] M. Drobek, C. Yacou, J. Motuzas, A. Julbe, L. Ding and J.C. Diniz da Costa, *J. Memb. Sci.*, 2012, **415**, 816-823.
- [14] C. Zhou, J. Zhou and A. Huang, *Microporous Mesoporous Mater.*, 2016, **234**, 377-383.
- [15] M. Elma, C. Yacou, J.C. Diniz da Costa and D.K. Wang, *Membranes*, 2013, **3**, 136-150.
- [16] P.S. Singh, S.G. Chaudhri, A.M. Kansara, W. Schwieger, T. Selvam, S. Reuss and V.K. Aswal, *Bull. Mater. Sci.*, 2015, **38**, 565-572.
- [17] R. Xu, P. Lin, Q. Zhang, J. Zhong and T. Tsuru, *Ind. Eng. Chem. Res.*, 2016, **55**, 2183-2190.
- [18] C.X.C. Lin, L.P. Ding, S. Smart and J.C. Diniz da Costa, *J. Colloid Interface Sci.*, 2012, **368**, 70-76.
- [19] Y. Zhu, K.M. Gupta, Q. Liu, J. Jiang, J. Caro and A. Huang, *Desalination*, 2016, **385**, 75-82.
- [20] S. Khajavi, J.C. Jansen and F. Kapteijn, *J. Memb. Sci.*, 2010, **356**, 52-57.
- [21] C. Yacou, S. Smart and J.C. Diniz da Costa, *Sep. Purif. Technol.*, 2015, **147**, 166-171.

- 
- [22] W. Kujawski, S. Krajewska, M. Kujawski, L. Gazagnes, A. Larbot and M. Persin, *Desalination*, 2018, **205**, 75-86.
- [23] M. Ding, H. Xu, W. Chen, G. Yang, Q. Kong, D. Ng, T. Lin and Z. Xie, *J. Memb. Sci.*, 2020, **600**, 117871.
- [24] K. Xu, B. Feng, C. Zhou and A. Huang, *Chem. Eng. Sci.*, 2016, **146**, 159-165.
- [25] M. Naim, M. Elewa, A. El-Shafei and A. Moneer, *Water Sci. Technol.*, 2015, **72**, 785-793.
- [26] E. Huth, S. Muthu, L. Ruff, J.A and Brant, *J. Water Reuse Desal.*, 2014, **4**, 109-124.
- [27] M. Sule, J. Jiang, M. Templeton, E. Huth, J. Brant and T. Bond, *Environ. Technol.*, 2013, **34**, 1329-1339.
- [28] E. Quinones-Bolanos, H. Zhou, R. Soundararajan and L. Otten, *J. Memb. Sci.*, 2005, **252**, 19-28.
- [29] S.G. Chaudhri, B.H. Rajai and P.S. Singh, *Desalination*, 2015, **367**, 272-284.
- [30] Q. Wang, Y. Lu and N. Li, *Desalination*, 2016, **390**, 33-46.
- [31] D. Wu, A. Gao, H. Zhao and X. Feng, *Chem. Eng. Res. Des.*, 2018, **136**, 154-164.
- [32] B. Liang, K. Pan, L. Li, E.P. Giannelis and B. Cao, *Desalination*, 2014, **347**, 199-206.
- [33] B. Liang, Q. Li, B. Cao and P. Li, *Desalination*, 2018, **433**, 132-140.
- [34] S.G. Chaudhri, J.C. Chaudhari and P.S. Singh, *J. Appl. Polym. Sci.*, 2018, **135**, 45718.
- [35] B. Liang, W. Zhan, G. Qi, S. Lin, Q. Nan, Y. Liu, B. Cao and K. Pan, *J. Mater. Chem. A*, 2015, **3**, 5140-5147.
- [36] E. Halakoo and X. Feng, *Sep. Purif. Technol.*, 2020, **234**, 116077.
- [37] J. Sun, X. Qian, Z. Wang, F. Zeng, H. Bai and N. Li, *J. Memb. Sci.*, 2020, **599**, 117838.
- [38] C. Cheng, L. Shen, X. Yu, Y. Yang, X. Li and X. Wang, *J. Mater. Chem. A*, 2017, **5**, 3558-3568.
- [39] Q. Li, B. Cao and P. Li, *Ind. Eng. Chem. Res.*, 2018, **57**, 11178-11185.
- [40] X. Qian, N. Li, Q. Wang and S. Ji, *Desalination*, 2018, **438**, 83-96.
- [41] J. Meng, C.H. Lau, Y. Xue, R. Zhang, B. Cao and P. Li, *J. Mater. Chem. A*, 2020, **8**, 8462-8468.
- [42] L. Li, J. Hou, Y. Ye, J. Mansouri and V. Chen, *Desalination*, 2017, **422**, 49-58.
- [43] G. Liu, J. Shen, Q. Liu, G. Liu, J. Xiong, J. Yang and W. Jin, *J. Memb. Sci.*, 2018, **548**, 548-558.

---

[44] R. Zhang, B. Liang, T. Qu, B. Cao and P. Li, *Environ. Technol.*, 2019, **40**, 312-320.
